# Supplementary material for: Enhancement of the thermoelectric performance of SnTe via Mn solubility control
Source: Royal Society of Chemistry journal article supplement (doi:10.1039/d4tc05287k), 2025-01-01
Supplement: d4tc05287k1.pdf [file d4tc05287k1.pdf]

## Supporting Information

# Enhancement of thermoelectric performance of SnTe via Mn solubility control

*Wenxuan Wang<sup>1</sup>, Dongyi Shen<sup>1</sup>, Haiqi Li<sup>1</sup>, Kejia Liu<sup>1</sup>, Chen Chen<sup>2\*</sup>, and Yue Chen<sup>1\*</sup>*

<sup>1</sup> Department of Mechanical Engineering, The University of Hong Kong, Pokfulam Road, Hong Kong SAR, China. E-mail: [yuechen@hku.hk](mailto:yuechen@hku.hk)

<sup>2</sup> Dongguan Key Laboratory of Interdisciplinary Science for Advanced Materials and Large-Scale Scientific Facilities, School of Physical Sciences, Great Bay University, Dongguan 523000, China. E-mail: [ccmldn@gbu.edu.cn](mailto:ccmldn@gbu.edu.cn)

Table S1 Densities of  $\text{Sn}_{1.03}\text{Te}$  and Ge, Mn and  $\text{AgBiSe}_2$ -alloyed  $\text{Sn}_{1.03}\text{Te}$ .

| Nominal composition                                                             | Density ( $\text{g}/\text{cm}^3$ ) | Relative density (%) |
|---------------------------------------------------------------------------------|------------------------------------|----------------------|
| $\text{Sn}_{1.03}\text{Te}$                                                     | 6.276                              | 97.2                 |
| $\text{Sn}_{1.03}\text{Te} + 3\% \text{AgBiSe}_2$                               | 6.393                              | 99.0                 |
| $\text{Sn}_{0.93}\text{Ge}_{0.1}\text{Te} + 3\% \text{AgBiSe}_2$                | 6.276                              | 97.2                 |
| $\text{Sn}_{0.93}\text{Mn}_{0.1}\text{Te} + 3\% \text{AgBiSe}_2$                | 6.225                              | 96.4                 |
| $\text{Sn}_{0.83}\text{Ge}_{0.1}\text{Mn}_{0.1}\text{Te} + 3\% \text{AgBiSe}_2$ | 6.188                              | 95.8                 |
| $\text{Sn}_{0.73}\text{Ge}_{0.1}\text{Mn}_{0.2}\text{Te} + 3\% \text{AgBiSe}_2$ | 6.210                              | 96.1                 |

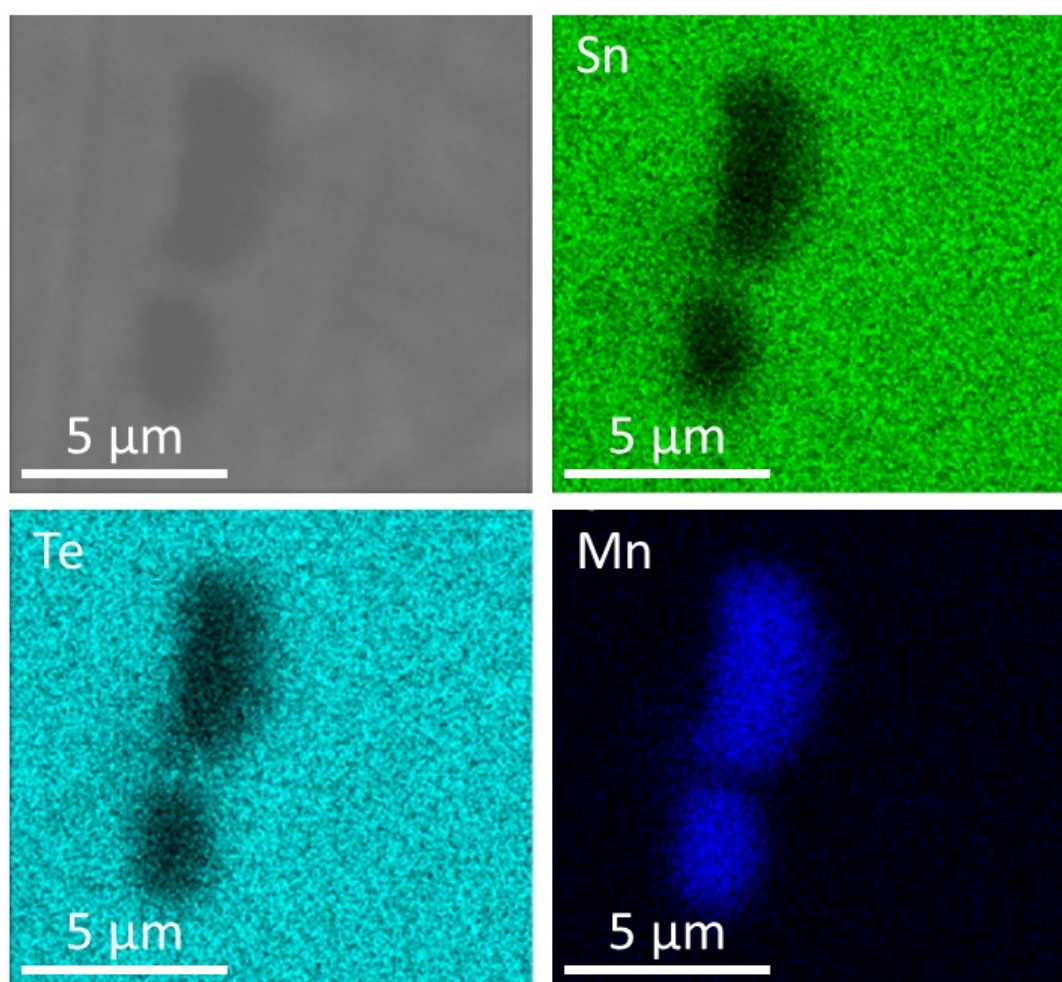

Figure S1 Scanning electron microscopy (SEM) image and the corresponding energy-dispersive X-ray spectroscopy (EDS) mapping of  $\text{Sn}_{0.93}\text{Mn}_{0.1}\text{Te} + 3\% \text{AgBiSe}_2$ .

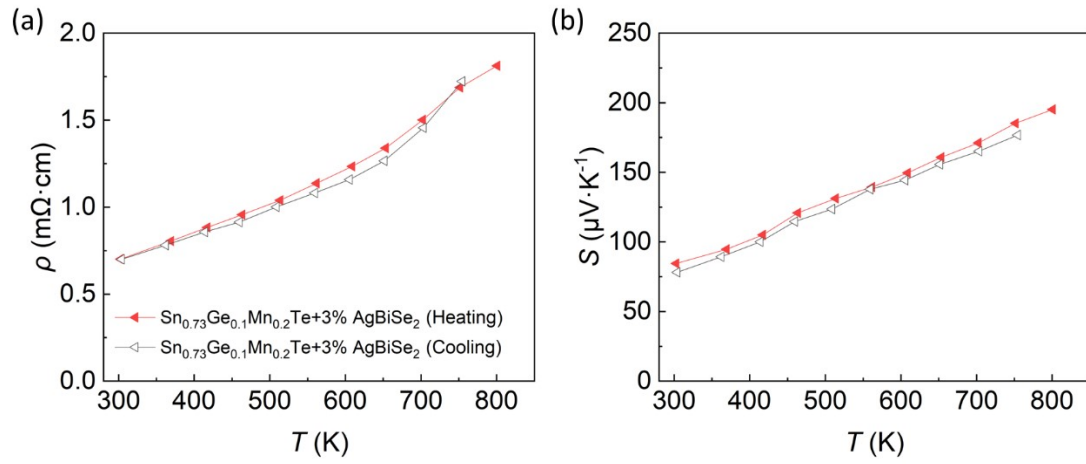

Figure S2 The temperature-dependent (a) electrical resistivity, (b) Seebeck coefficient, and (c) power factor of  $\text{Sn}_{0.73}\text{Ge}_{0.1}\text{Mn}_{0.2}\text{Te} + 3\% \text{AgBiSe}_2$  during a heating-cooling cycle.
